# Supplementary material
Source: Elsevier journal article supplement (https://www.sciencedirect.com/science/article/pii/S0034709420303470)
Supplement: mmc1 [file S0034709420303470:mmc1.docx]

**BJAN-2020-38 – Material Suplementar**

**Anexo 1** Estratégias de busca utilizadas para MEDLINE/PubMed

| (postoperative[tiab] OR perioperative[tiab] OR postsurgical[tiab] OR perioperative[tiab] OR intraoperative[tiab] OR “pain postoperative”[mh] OR “pain postoperative”[tiab] OR intraoperative[tiab) AND (Buprenorphine[mh] OR Buprenorphine[tiab]) AND (opioids[tiab] OR opioid[tiab] OR Fentanyl[mh] OR Fentanyl[tiab] OR Duragesic[tiab] OR Durogesic[tiab] OR Fentanest[tiab] OR “Fentanyl Citrate”[tiab] OR Fentora[tiab] OR “R-4263”[tiab] OR Sublimaze[tiab] OR “Transmucosal Oral Fentanyl Citrate”[tiab] OR “R 4263”[tiab] OR “R4263”[tiab] OR Phentanyl[tiab] OR remifentanil[tiab] OR “3-(4-methoxycarbonyl-4-((1-oxopropyl)phenylamino)-1-piperidine)propanoic acid methyl ester”[tiab] OR “remifentanil monohydrochloride”[tiab] OR “GI 87084B”[tiab] OR “GI87084B”[tiab] OR “GI-87084B”[tiab] OR “remifentanil hydrochloride”[tiab] OR Ultiva[tiab] OR Sufentanil[mh] OR Sufentanil[tiab] OR “R-30730”[tiab] OR “Sufenta”[tiab] OR “Sulfentanil”[tiab] OR “Sulfentanyl”[tiab] OR “R 30730”[tiab] OR “R30730”[tiab] OR “SufentanilHameln”[tiab] OR “SufentanilRatiopharm”[tiab] OR “sufentanil”[tiab] OR “alfentanil”[tiab] OR morphine[tiab~] OR morphine[mh] OR tramadol[mh]) AND (“pain control”[tiab] OR analgesic[tiab] OR anesthesia[tiab] OR “anesthesia care”[tiab] OR analgesia[tiab] OR “pain management”[tiab] OR “pain scores”[tiab] OR “PCA”[tiab] OR “patient-controlled analgesia”[tiab] OR “analgesia”[tiab] OR “pain control”[tiab] OR anaesthesia[tiab] OR anaesthetic[tiab] OR pain, acute) |
| --- |
